# Supplementary material
Source: PubMed Central journal article supplement (PMC4863383)
Supplement: supp_tpc.15.00879_TPC2015-00879-RAR3_Supplemental_Data_pdf_combined.pdf [file supp_tpc.15.00879_TPC2015-00879-RAR3_Supplemental_Data_pdf_combined.pdf]

**Supplemental Figure 1:** Sequence context of the detected mutations at oligo(N) stretches.

**M26/M27 (I-re/I-mi) – single bp insertion at oligo(G) stretch**

5' -TACGAAAAGAAAA GGGGGG -TATGAGATAACCATAACGGA-3' [WT]  
5' -TACGAAAAGAAAA GGGGGG G TATGAGATAACCATAACGGA-3' [mutation]

---

**M9 (I-iota) – single bp insertion at oligo(A) stretch [site identical with second mutation in M44 (III-delta)]**

5' -CCACACTTG AAAAAAAAAA -TCGGGCCGTATCGCTCAAAT-3' [WT]  
5' -CCACACTTG AAAAAAAAAA A TCGGGCCGTATCGCTCAAAT-3' [mutation]

---

**M44 (III-delta) - second mutation in M44, which is a second site mutant of M42 – single bp deletion at oligo(A) stretch [site identical with M09 (I-iota)]**

5' -CCACACTTG AAAAAAAAAA TCGGGCCGTATCGCTCAAAT-3' [WT]  
5' -CCACACTTG AAAAAAAAAA -TCGGGCCGTATCGCTCAAAT-3' [mutation]

---

**M39 (II-my) - second mutation in M39 – single bp deletion at oligo(A) stretch**

5' -ACCAAG AAAAAAAAAA GAAAATAAAGAACTCATTCC-3' [WT]  
5' -ACCAAG AAAAAAAAAA -GAAAATAAAGAACTCATTCC-3' [mutation]

---

**M37 (II-kappa) - second mutation in M37 – single bp insertion/deletion at tandem oligo(C+A) stretch; results in a transversion**

5' -ATAACTTGAT CCCCCCCCCCAAAAAAAAAA GGATTTTCGT-3' [WT]  
5' -ATAACTTGAT CCCCCCCCCCA AAAAAAAAAA GGATTTTCGT-3' [mutation]

---

**M39 (II-my) - first mutation in M39 – perfect micro tandem duplication at oligo(C) stretch**

5' -CCGAGGGTTTTGAATTAG CC ----- CCCCCC GCTCGTATTTACACC-3' [WT]  
5' -CCGAGGGTTTTGAATTAG CC TAGCC CCCCCC GCTCGTATTTACACC-3' [mutation]

---

**Supplemental Figure 2:** Sequence context of the detected micro tandem duplications.

**M2 (I-beta) - first mutation in M2 – perfect micro tandem duplication at perfect micro tandem repeat**

5' -ATATTACCTGAATGGTATTT----CTTTC CCGTATTTCAAATAC-3' [WT]  
5' -ATATTACCTGAATGGTATTTATTTCTTTC CCGTATTTCAAATAC-3' [mutation]

---

**M19 (I-tau) – perfect micro tandem duplication at imperfect micro tandem repeat**

5' -AATAGAGCTTTTGCGCATTT----TCGTTAATCCATGAACAGAG-3' [WT]  
5' -AATAGAGCTTTTGCGCATTTATTTTCGTTAATCCATGAACAGAG-3' [mutation]

---

**M28 (II-alpha), identical with first mutation of M40 (II-ny), which is a second site mutant of M28 – perfect micro tandem duplication at imperfect micro tandem repeat**

5' -TCCTTTATATGGAATAAA----GGGCAGGGGGCCATTCCCTT-3' [WT]  
5' -TCCTTTATATGGAATAAAAAAGGGGCAGGGGGCCATTCCCTT-3' [mutation]

---

**M33 (II-zeta) – perfect micro tandem duplication at imperfect micro tandem repeat**

5' -TGGGCCGGTTCGATGGCTTT----ATATGAATTA GCCGTT-3' [WT]  
5' -TGGGCCGGTTCGATGGCTTTCTTTATATGAATTA GCCGTT-3' [mutation]

---

**M42 (III-beta), identical with first mutation of M44 (III-delta), which is a second site mutant of M42 - perfect micro tandem duplication at imperfect micro tandem repeat**

5' -GAATGTTAGACCATAAA-----GAAGCTATTATATCCCAT-3' [WT]  
5' -GAATGTTAGACCATAAAATAAAGAAGCTATTATATCCCAT-3' [mutant]

---

**M47 = M36 (IV-delta = II-iota) - perfect micro tandem duplication at imperfect micro tandem repeat**

5' -ATGTATCTTACCAATTAC-----CAATTTCTAAACGCGGGAGTA-3' [WT]  
5' -ATGTATCTTACCAATTAACTTAACCAATTTCTAAACGCGGGAGTA-3' [mutant]

---

**M6 (I-zeta) – imperfect micro tandem duplication at imperfect micro tandem repeat**

5' -TTTCTAGGCTTTCACAGTTT-----TGGTTGTATATTCATAACG-3' [WT]  
5' -TTTCTAGGCTTTCACAGTTTGTTTTGGTTGTATATTCATAACG-3' [mutant]

---

**M7 (I-eta) – perfect micro tandem duplication at imperfect nested micro tandem repeat**

5' -GTTAGGCTCTTTAAC**GATT**----**GTTGT**AGCTCACCATATGTAT-3' [WT]  
5' -GTTAGGCTCTTTAAC**GATTGATTGTTGT**AGCTCACCATATGTAT-3' [mutant]

---

**M30 (II-gamma) - perfect micro tandem duplication at perfect nested micro tandem repeat**

5' -CGTTCCTTTTGCTGA**TATTAT**-----**TACCAGTATTCGATACTGGG**-3' [WT]  
5' -CGTTCCTTTTGCTGA**TATTATATTATTACCAGTATTCGATACTGGG**-3' [mutation]

---

**M41 (III-alpha) – perfect micro tandem duplication at perfect nested micro tandem repeat [site identical with M14 (I-xi)]**

5' -GCCTAGTTTTGGTGTAGCAGCT**TATATT**-----TCGCTTCATCCTC-3' [WT]  
5' -GCCTAGTTTTGGTGTAGCAGCT**TATATTTATATT**TCGCTTCATCCTC-3' [mutation]

---

**M24 (I-omega) – perfect micro tandem duplication at perfect nested micro tandem repeat**

5' -GCCACAACATGGGCAT**TCTT**----**CTTAGCAAGAATTATTGCAG**-3' [WT]  
5' -GCCACAACATGGGCAT**TCTTCTTCTTCTTAGCAAGAATTATTGCAG**-3' [mutant]

---

**M32 (II-epsilon) - perfect micro tandem duplication at perfect micro tandem/direct repeat(s)**

5' -CAATAGCTAAGGGCC**CTGAG**----**ACTACCACTTGGATCTGGAA**-3' [WT]  
5' -CAATAGCTAAGGGCC**CTGAGTGAGACTACCACTTGGATCTGGAA**-3' [mutant]

---

**M34 (II-eta) – perfect micro tandem duplication at perfect micro tandem/direct repeat(s)**

5' -TTTACACACTTTTGT**ATTAC**-----**CTCTTCTTAC**GGCCGTATTT-3' [WT]  
5' -TTTACACACTTTTGT**ATTACATTACCTCTTCTTAC**GGCCGTATTT-3' [WT]

---

**M3/M5 (I-gamma/I-epsilon) - perfect micro tandem duplication at perfect micro direct repeat**

5' -TAACCAGC**ACCG**AAA**ACCG**T--CTTTACATCGGATGGTTT-3' [WT]  
5' -TAACCAGC**ACCG**AAA**ACCGTGT**CTTTACATCGGATGGTTT-3' [mutant]

---

**M21 (I-phi) – perfect micro tandem duplication at perfect micro direct repeat**

5' -CTTTTTTTTT**TAT**GATATTT----**TATACTCTAGAACATATATT**-3' [WT]  
5' -CTTTTTTTTT**TATGATATTTATTTTATACTCTAGAACATATATT**-3' [mutation]

---

**M22 (I-chi) - perfect micro tandem duplication at perfect micro direct repeat**

5' -ATATGTTTTCTGATACCGCT-----ATACAATTACAACCCGTCTT-3' [WT]  
5' -ATATGTTTTCTGATACCGCTCCGCTATACAATTACAACCCGTCTT-3' [mutant]

---

**M23 (I-psi) - perfect micro tandem duplication at perfect/imperfect micro direct repeat(s)**

5' -ATTGGCGATTCTAGTATTGA-----GCGAAAGGTTACACCTATGT-3' [WT]  
5' -ATTGGCGATTCTAGTATTGAATTGAGCGAAAGGTTACACCTATGT-3' [mutation]

---

**M43 (III-gamma) - first mutation in M43 - perfect micro tandem duplication at imperfect micro direct repeat**

5' -GGGGAGGCGGTGATTTAGTA-----GCAGTGGGGGCAAGGTTGC-3' [WT]  
5' -GGGGAGGCGGTGATTTAGTAATTTAGTAGCAGTGGGGGCAAGGTTGC-3' [mutant]

---

**M45 (IV-alpha) - perfect micro tandem duplication at imperfect micro direct repeat**

3' -GCATTGTACAAGGACGTACT-----GTAGGAGTAACCCATTACCT-5' [WT]  
5' -GCATTGTACAAGGACGTACTGTACTGTAGGAGTAACCCATTACCT-3' [mutant]

---

**M51 (I-fa) - perfect micro tandem duplication at imperfect micro direct repeat**

5' -CTAGGATTTATCTTTTAACT-----CATAGGTATTCTTTCTGGAG-3' [WT]  
5' -CTAGGATTTATCTTTTAACTTAACCATAGGTATTCTTTCTGGAG-3' [mutation]

---

**M1/M4 (I-alpha/I-delta) - perfect micro tandem duplication at perfect micro palindrome**

5' -ACTATGACTATAGCCCTTGG-----TAAATTTACCAAAGACGAAA-3' [WT]  
5' -ACTATGACTATAGCCCTTGGCTTGGTAAATTTACCAAAGACGAAA-3' [mutation]

---

**Supplemental Figure 3:** Sequence context of the detected micro deletions.

**M17 (I-rho) – first mutation in M17 – micro deletion at perfect nested micro tandem repeat**

5' -CCAATACGCGAGTTTCAACAACCTCTCGTTCTTTACATTTC-3' [WT]  
5' -CCAATACGCGAGTTTCA-----CTCTCGTTCTTTACATTTC-3' [mutation]

---

**M14 (I-xi) – micro deletion at perfect nested micro tandem repeat [site identical with M41 (III-alpha)]**

5' -GCCTAGTTTTGGTGTAGCAGCTATATTTTCGCTTCATCCTC-3' [WT]  
5' -GCCTAGTTTTGGTGTAG-----ATATTTTCGCTTCATCCTC-3' [mutation]

---

**M11 (I-lambda) – micro deletion at imperfect micro tandem repeat**

5' -GTAGGTATCTGGTTCACTGCTTAGGTATTAGCACCATGG-3' [WT]  
5' -GTAGGTATCTGGTTCACT-----TAGGTATTAGCACCATGG-3' [mutant]

---

**M16 (I-pi) - micro deletion at imperfect micro tandem repeat**

5' -AACCTGTTTCTGGATCTCTCTTATGGAAACAATATTAT-3' [WT]  
5' -AACCTGTTTCTGGATCT-----TTATGGAAACAATATTAT-3' [mutant]

---

**M40 (II-ny) - second mutation in M40, which is a second site mutant of M28 (III-alpha) - micro deletion at imperfect micro tandem repeat**

5' -TATGGTTCAGCAACTACCCCTATTGAATTGTTTGGTCCCA-3' [WT]  
5' -TATGGTTCAGCAACTACCC--ATTGAATTGTTTGGTCCCA-3' [mutation]

---

**M25 (I-do) – micro deletion at imperfect nested micro tandem repeat**

5' -AGAAAAGTTATGTAAGGACAAATAACCTCGTCAAGTACTAT-3' [WT]  
5' -AGAAAAGTTATGTAAGG-----ACCTCGTCAAGTACTAT-3' [mutation]

---

**M49 (V-alpha) – micro deletion at perfect/imperfect micro tandem/direct(s)**

5' -GGTACATGCGAAGAAATGATGAAAGGGCTATATTTGCCA-3' [WT]  
5' -GGTACATGCGAAGAAAT-----AAGGGCTATATTTGCCA-3' [mutation]

---

**M13 (I-ny) – micro deletion at perfect nested micro direct repeat(s)**

5' -TGGTTTACGTACTAACGAAGATCTTTATACAGGAGCGCTT-3' [WT]  
5' -TGGTTTACGTACTAACGA----CTTTATACAGGAGCGCTT-3' [mutant]

---

**M18 (I-sigma) - micro deletion at imperfect micro direct repeat**

5' -TCGTAATGCATGACTACTTAACAGGGGGATTCACTGCAAA-3' [WT]  
5' -TCGTAATGCATGACTAC-----AGGGGGATTCACTGCAAA-3' [mutation]

---

**M48 (IV-epsilon) – micro deletion at imperfect micro direct repeat(s)**

5' -AGCTTGTTACATGGGCCGTGACTGGGAACTTAGTTCCGTCTGGGTAT-3' [WT]  
5' -AGCTTGTTACATGGGCCGTG-----CTTAGTTCCGTCTGGGTAT-3' [mutation]

---

**M35 (II-theta) – micro deletion at perfect micro inverted repeat**

5' -ATCGATTCATAGGGTCTTAACAAGAGAATTCCTATCATT-3' [WT]  
5' -ATCGATTCATAGGGTCTTA--AAGAGAATTCCTATCATT-3' [mutation]

---

**Supplemental Figure 4:** Sequence context of the detected macro tandem duplications.

**M12 (I-my) – perfect macro tandem duplication at imperfect macro direct repeat**

**WT:**

ATGATGCACGTAAGTATGATGGTATTGGGCTATGCAGCTCTTTTGTGTGGATCATTATTATCAGTAGCTC  
TCTTAGTCATTACATTTTCGAAAAGCTCTAAGAATTTTAGTAAAAGAAAGCATTTTTAAAGAATTCATT  
TTCTTTGTGGAGATCCAATATAGGAATGAACCAAGCAATGTTTACTAAGCACCTCTTTTATTCTTCT  
AAAACTATTACAGGGCTCAA

**mutation:**

ATGATGCACGTAAGTATGATGGTATTGGGCTATGCAGCTCTTTTGTGTGGATCATTATTATCAGTAGCTC  
TCTTAGTCATTACATTTTCGAAAAGCTCTAAGAATTTTAGTAAAAGAAAGCATTTTTAAAGAATTTTA  
GTAAAAAGAAAGCATTTTTAAAGAATTCATTTTCTTTGTGGAGATCCAATATAGGAATGAACCAAGCAA  
TGTTTACTAAGCACCTCTTTTATTCTTCTAAAACTATTACAGGGCTCAA

---

**M8 (I-theta) – perfect macro tandem duplication at imperfect macro inverted repeat**

**WT:**

GGCGTGGATATTGGCAGGAATTGATTGAACTTTAGCATGGGCTCACGAACGGACGCCCTTGGCTAATTT  
GATTCGGTGGAGAGATAAACCGGTGGCTCTTTCCATTGTGCAAGCAAGATTGGTTGGATTAGCCCACTTT  
TCTGTAGGTTATATATTCACTTATGCGGCTTTCTTGATTGCTTCGACATCAGGCAAATTTGGTTAATTCT  
TTCTGTGTTGTATACGCGAGAA

**mutation:**

GGCGTGGATATTGGCAGGAATTGATTGAACTTTAGCATGGGCTCACGAACGGACGCCCTTGGCTAATTT  
GATTCGGTGGAGAGATAAACCGGTGGCTCTTTCCATTGTGCAAGCAAGATTGGTTGGATTAGTTCCATTG  
TGCAAGCAAGATTGGTTGGATTAGCCCACTTTTCTGTAGGTTATATATTCACTTATGCGGCTTTCTTGAT  
TGCCTTCGACATCAGGCAAATTTGGTTAATTCTTTCTGTGTTGTATACGCGAGAA

**II-beta = III-epsilon (M29) – perfect macro tandem duplication at imperfect macro inverted repeat**

**WT:**

AAATTATGCGGAAGCTTTACAGAATTATTATGAAGCTATGCGACTAGAAATTGATCCTTATGATCGAAGC  
TATATACTCTATAACATAGGCCTTATCCACA**CAAGTAATGGAGAACACACGAAAGCTTT**GGAATATTATT  
TTCGGGCACTAGAACGAAACCCGTTCTTACCCCAAGCTTTTAATAATATGGC**TGTGATCTGTCATTACGT**  
**G**CGACTATCTCCACTATAG

**mutation:**

AAATTATGCGGAAGCTTTACAGAATTATTATGAAGCTATGCGACTAGAAATTGATCCTTATGATCGAAGC  
TATATACTCTATAACATAGGCCTTATCCACA**CAAGTAATGGAGAACACACGAAAGCTTTACAAGTAATGG**  
**AGAACACACGAAAGCTTT**GGAATATTATTTTCGGGCACTAGAACGAAACCCGTTCTTACCCCAAGCTTTT  
AATAATATGGC**TGTGATCTGTCATTACGTG**CGACTATCTCCACTATAG

---

**M10/M15 (I-kappa/I-omikron) – perfect macro tandem duplication at imperfect dispensed macro inverted repeat(s)**

**WT:**

CTATTAGATCGTGTCTTAGGCATCGCGATGCAATCATATCACATCTCAATTGGGTATGTATTTTTCTAG  
GCTTTCACAGTTT**TGGTTTGTAT**ATTCATA**ACGATA****CCATGAGCG****CTTTAGGACGCCCTCAAGATATGTT**  
**TTCTGATACCGCTATACAATTACAACCCGTCTT****TGCTCAATGGATACAAAACA**CCCATGCATTAGCGCCC  
GGTGCAACGGCCCCCTGGTGCAACAACAAGCACCAGTTTGGCTTGGGGAGGCGGTGATTTA

**mutation:**

CTATTAGATCGTGTCTTAGGCATCGCGATGCAATCATATCACATCTCAATTGGGTATGTATTTTTCTAG  
GCTTTCACAGTTT**TGGTTTGTAT**ATTCATA**ACGATA****CCATGAGCG****CTTTAGGACGCCCTCAAGATATGTT**  
**TTCTGATACCGCTATACAATTACAACCCGTACGATACCATGAGCGCTTTAGGACGCCCTCAAGATATGTT**  
**TTCTGATACCGCTATACAATTACAACCCGTCTT****TGCTCAATGGATACAAAACA**CCCATGCATTAGCGCCC  
GGTGCAACGGCCCCCTGGTGCAACAACAAGCACCAGTTTGGCTTGGGGAGGCGGTGATTTA

**I-ypsilon (M20) – first mutation in M20 – perfect macro tandem duplication at perfect/imperfect dispensed macro inverted repeat(s)**

**WT:**

AATTTTCAACGTGCTCGGAGAGCCTGTTGATGAATTAGGACCCGTAGATACTCGTACAACATCTCCTATT  
CATAGATCCGCGCCCGCCTTTATACAGTTAGATACAAAATTATCTATTTTTGAAACAGGAATTAAGTAG  
TCGATCTTTTAGCCCCCTATCGCCGTGGAGGAAAAATAGGCCTATTGGGGGGGGCTGGGGTAGGTAAAAC  
AGTCCTCATTATGGAATTGATCAA

**mutation:**

AATTTTCAACGTGCTCGGAGAGCCTGTTGATGAATTAGGACCCGTAGATACTCGTACAACATCTCCTATT  
CATAGATCCGCGCCCGCCTTTATACAGTTAGATACAAAATTATCTATTTTTGAAACAGGAATTAAGTAGACA  
AAATTATCTATTTTTGAAACAGGAATTAAGTAGTCGATCTTTTAGCCCCCTATCGCCGTGGAGGAAAAA  
TAGGCCTATTGGGGGGGGCTGGGGTAGGTAAAACAGTCCTCATTATGGAATTGATCAA

---

**Supplemental Figure 5:** Sequence context of the detected macro tandem duplication and deletion.

**M20 (l- ypsilon) – second mutation in M20 – macro tandem duplication + macro deletion at complex macro tandem/directed repeat(s)**

**WT:**

TTATCCCTTCGTGAAAACGTTAGTAAATAGAATTAATGGCCCTGCAGTACCAAAAAAAAAAGAAAAAATT  
TCCAAAAGCAAACAAAAAAACGTCAAAAACAAACAAAAAAACGTCAAAAACAAACAAAAAAACGTCAAAA  
GCAAACAAAAACGAAATCAAAAACAAACAAAAAAACGTCAAAAACAAACAAAAAAACGTCAAAAACAAAC  
AAACGAAATCAAAAACAAACAAAAAAACGTCAAAAACAAACAAAAAAACGTCAAAAACAAACAAAAAAACGT  
GAAATCAACCCACACGGAAT

**mutation:**

TTATCCCTTCGTGAAAACGTTAGTAAATAGAATTAATGGCCCTGCAGTACCAAAAAAAAAAGAAAAAATT  
TCCAAAAGCAAACAAAAAAACGTCAAAAAGCAAACAAAAAAACGTCAAAAAGCAAACAAAAAAACGTCAAAA  
GCAAACAAAAaaacgtcaaaagcaaacaaaaCGAAATCAAAAAGCAAACAAAAACGAAATCAAAAAGAAAGT  
AAACGAAATCAAAAAGAAAGTAAACGAAATCAAAAAGAAACAAAAACGAAAGCTACCCACGAGGAGTCAA  
TTCGGCGCAACCCCAAAAACCGAAATCAACCCACACGGAAT

**bold:** mutation

**lowercase:** deletion

**capital letters:** perfect tandem duplication

---

**Supplemental Figure 6:** Sequence context of the detected macro deletions.

**M2 (I-beta) – second mutation in M2 - macro deletion at complex macro tandem/directed repeat(s)**

**WT (deletion marked by lowercase):**

```
CATCACAAACCTCCTTGTGGTTGTTGTAATTTTGTATTTTTTTATCTTTTTTATAAGATAATTACTTTAGAA
AGTGGAGTAGAATTACTTTTTGAATAGAATAGTTCTTTTTGAAGCTGAAGCTATTCTTTATCTTTATTTTA
TCTTTATATAGAATATGCAATTTGTATTTACTCTATGTAATTTGTATCTTTATATGTAATTTGTATCTTT
ATTTTTATATGTAATTTGTATTTTTATATGTAATTTGTATTTTTATATGTAATTTGTATTTTTATATGta
atTTgtatTTTTatgatgaatTTgtatTTTTattatTTTTatgatgaatTTgtatTTTTatATgGAATAT
GTAAATTTGTATCTTTATTTTTATAATGTAATTTGTATTTACTCTATGTAATTTGTATTTTTATATGGAATA
TGTAATTTTTTGAAGTGATTCTTTCT
```

---

**M30 (III-gamma) – macro deletion at complex macro tandem/directed repeat(s)**

**WT (deletion marked by lowercase)**

```
GCGTGATGACTTCGATGATAACGACGATGATGACGCCGATGATGAATGGCAGGTTTACAAGGATCGTGAC
TGGGGGGGTCTTGACTCGGCTGAGTACTCGTATGATGACTCGGATGATGACTCGTATGATG CCTCGGCTG
ATGACTCGGCTGATG CCTCGGCTGATG actcggctgatg CCTCGGCTGATG ACTGGGAGGTTT ACTCGGC
TGCTGACTGGGAT TGGGATCTTT ACTCGGCTGATG CCTCGGCTGATG ACTCGGCTGATG CCTCGGCTGAT
GACTGGGAGGTTT ACTCGGCTGCTG ACTGGGATGTTT ACTCGGCTGATG CCTCGGCTGATG ACTCGGCTG
ATG CCTCGGCTGATG ACTTGGATGATGACTCCGATGATGACTCCGATGATGCCAGGTATTATTATTATGA
CTGGTATTATGACTACGATGAT
```

**types of repeats:**

|        |        |        |
|--------|--------|--------|
| CCTCGG | AGGTTT | CTGATG |
| ACTCGG | ATGTTT | CTGGTG |
| ACTGGG | ATCTTT |        |
| ATTGGG |        |        |

**M50 (V-delta) – second mutation in M50 - macro deletion at perfect/imperfect macro tandem/directed repeat(s)**

**WT (deletion marked by lowercase):**

TCCTATGAAGCCTACCAAGCCTGAAGGGCCTAAAAAGCCTAACAAGTCTAACGAGGAAGCGGAAGAGCTT  
GAAGGGGATAATAAGGAAGACCTTGAAGGGGATAAGCAGAAGGATAAGAAAGATGAGCTTTTCTTCGTCG  
ATTATGACGATGAGGAAGAGGAAGAAGAGCTTTTCTTCGTCGATTATGGCGATGAGGATGAGGAAGAAGA  
Gcttttcttcgctcgattatgacgatgaggaagaggaagaagagcttttcttcgctcgattatggcgatgag  
gatgaggaagaagaggataagcagaaggataaagaagatgagcttttcttcgctcgattatggcgatgag  
atgaggaagaagagGATAAGCAGAAGGATAAGAAAGATGAGCTTTTCTTCGTCGATTATGACGATGAGGA  
TGAGGAAGAGCTTGAAGGGGATAATAAGCCTAACAAGTCTAACG

---

**M17 (I-rho) – second mutation in M17 – macro deletion at perfect/imperfect macro tandem repeat(s)**

**WT (deletion marked by lowercase)**

GCCTACCAAGGCTAAAAGGAGTAAGAAAAAGCCTCTTGAGGATAAGGATGGCCAAGATCCTTTAGATCCT  
TTAGATCCTTTACCTTTAGATCCTTTAGATcctttagatcctttaccttttagatcctttaCCTTTAGATC  
CTTTACCTTTAGATCCTTTACCTTTAGATCCTTTACCTTTAGATCCTATGAAGCCTACCAAGCCTGAAGG  
GCCTAATGAAGCCTACCAAGCCTGAAGGGCCTAAAAAGCCTAACAAGT

---

**M31 (II-delta) – macro deletion at imperfect macro directed repeat**

**WT (deletion marked by lowercase):**

ATACGTGGATATCAAAAAGGGCACGAAATTAAAGTATCTTGGCTCAATCTCTTGAGTCGCTCCGGAATTC  
GATTGATGTGAAAAATCTGGTAAAATCATtgattcatctggtgtctaaatataTGATTCATTATAAGT  
TACTAGATCGAAAGTTTATGACATTCCAAAATTGATAGATCCAATGTTCGCATTCAGTAAAGATTTATGAT  
ACCTGTATAGGATG

---

**M38 (II-lambda) - macro deletion at imperfect macro directed repeat**

**WT (deletion marked by lowercase):**

TATTTGAAGCAGTTGTTTCGAATTCCTTATGATAGGCAAGTAAACAAGTTCTTGCTAATGGTAAAAAAGG  
GGTTTGAATGTGGGCGCTGTTCTTATTTTaccggagggttttgaattagcccccccgctcgtatttCA  
CCCCGAGATGAAAGAAAGGATAGGCAATCCGTCTTTTCAGAGCTATCGCCCCACTAAAAAAAATATTTCTTG  
TTATAGGTCCCGTTCCCGGCCAGAAATAT

---

**V-delta (M50) – first mutation in M50 – macro deletion (1364 bp), potentially resulting from non-homologous end-joining-like pathway**

**WT (deletion marked by lowercase):**

```
CGGATTCAAATATTTCTTATTATTTCATGCCTGGCAAAAAGAAAGAATTTGAGTAAACGATCCTATTTTTT
TTTAATGAGTCTGTTTTTATGTTATTTTCGTAATTCCTTTGTTTGTGGGATCATTTTCTCACGA
GAGGTAATGAAAAGAATTATAGAAATGGATTGCTATCTATGCCTAGATCAAGGATAAATGGAAATTTTATT
GATAAGACCTTTTCAATTGTAGCCAATATCTTATTACGAATAATTCGACAACCTTCAGGGGAAAAAGAGG
CATTTACCTAttacagagatgggtgcgatttgattatcttatttggttgatccttagaagaaagacacgt
gattcgggatagaaaataaagaaaaaagtaaaaaaaaaaatttacgctttttgggggtgaagttgtaaa
aaaacaactccctctgctgctgatccacgattaatgcagcctcagatgcttcaattggcgattctagat
tgagcgaaggttacacctatgtgggttatttatgtattgcaggtcaaccccgctccatgagtaccaata
ggtggcatagaggaagaagcactacgcctaggaatcaacaacacgaaaactttgtagaaatttgatacc
ctttccttatcaagatcggaactcagaagaatgggtgggccaacaagatccatctcgcttcgattttgg
atacacgtataaccatcgaagactggtgaagtgaacgaattcctcgaattaaggggctgagggacaaag
aaattggtgaagttacctttttttatctagatcaacacgtttgatgtaagaaagatcttttgctggg
aaggttggttagagatttcttgtaaaaacactagccccgctcagtcataatgcgaatatttcaatcttt
tttgattccatgtattattctcattatgcacataagggaggagccgtatgaggtgaaaatctcacgtacg
gttctgaaacggagattctttgaaatcgaagacgaccgtaacggatgctggctcagtcagaaggaaattat
gcggaagctttacagaattattatgaagctatgcgactagaaattgatccttatgatcgaagctatatac
tctataacataggccttatccacacaagtaatggagaacacacgaaagctttggaatattattttcgggc
actagaacgaaaccgcttcttaccccaagcttttaataatattggctgtgatctgtcattacgtgcgacta
tctccactatagaaagaaacgggggaagagaaaagagcgaatccactagcaatactagaaaaaatgccg
agaaaaaaattgatacatatgcatcgtaaaaaaaaaacgatttttatcagctgtagcaagaaaaaaggaa
cttcatagaagtcgaaatattgaagaaatggatatgcctagatactttattctatggataaaggatcta
tgatagagaagcaccgtaagatcaattagtgagggtttgggcccatacaataagaactgcttacttac
ttttgtgatgatataagataaaaaggttaggaatcgacttatgtaataaaggcgatcccctaaaggattgag
cagcgggtgtagcagcagatcccaaagatagtaagacttttctcATAATAAAGAAAAGTCTTTTTTCGAAA
ATTCTATATAAATTTTCTATGAAACCGAGATAGTTAACTTTTCAGAAAATTCTAGCGAGAGTGGAAATGC
TTATGCTTTTATTCTTCTGAAGGTGGGAGAAAAGATAAAACTAAAAAACGGATTTTGAATCAAAATGAAA
GTTTGAAACTCATGTAATTAACCTCTTTTGGTTAACCCGAGAAAAATTGGATAGATCTATGAAAAATCTC
ATTATTCAATTAGATATTAGATTATCTAGAGTAGATTAATAAAAAATGGGACACCACAAGAATTGAATGCTG
```

---

**Supplemental Table 1.** Origin of the mutant lines in the *Oenothera* plastome mutant collection

| Mutant <sup>1)</sup> |                                     | Origin                    | Wild type background <sup>2)</sup> | Experimenter / Year   |
|----------------------|-------------------------------------|---------------------------|------------------------------------|-----------------------|
| M1                   | I-alpha                             | spontaneous               | hookeri de Vries                   | W. Stubbe in 1958     |
| M2                   | I-beta                              | spontaneous               | hookeri de Vries                   | C. Harte in 1958      |
| M3                   | I-gamma                             | spontaneous               | hookeri de Vries                   | G. Baumgarten in 1956 |
| M4                   | I-delta                             | spontaneous               | hookeri de Vries                   | C. Harte in 1957      |
| M5                   | I-epsilon                           | spontaneous               | hookeri de Vries                   | C. Harte in 1957      |
| M6                   | I-zeta                              | spontaneous               | johansen Standard                  | W. Stubbe in 1962     |
| M7                   | I-eta <sup>3)</sup>                 | spontaneous <sup>3)</sup> | elata Toluca                       | H. Kutzelnigg in 1965 |
| M8                   | I-theta <sup>3)</sup>               | spontaneous <sup>3)</sup> | hookeri de Vries                   | H. Kutzelnigg in 1965 |
| M9                   | I-iota                              | spontaneous               | hookeri de Vries                   | H. Kutzelnigg in 1966 |
| M10                  | I-kappa                             | spontaneous <sup>4)</sup> | hookeri de Vries                   | H. Kutzelnigg in 1971 |
| M11                  | I-lambda                            | spontaneous <sup>4)</sup> | hookeri de Vries                   | H. Kutzelnigg in 1966 |
| M12                  | I-my                                | spontaneous <sup>4)</sup> | hookeri de Vries                   | H. Kutzelnigg in 1966 |
| M13                  | I-ny                                | spontaneous <sup>4)</sup> | hookeri de Vries                   | H. Kutzelnigg in 1967 |
| M14                  | I-xi                                | spontaneous               | johansen Standard                  | W. Stubbe in 1968     |
| M15                  | I-omikron                           | spontaneous <sup>4)</sup> | hookeri de Vries                   | H. Kutzelnigg in 1971 |
| M16                  | I-pi                                | spontaneous <sup>4)</sup> | hookeri de Vries                   | H. Kutzelnigg in 1966 |
| M17                  | I-rho                               | spontaneous <sup>4)</sup> | hookeri de Vries                   | H. Kutzelnigg in 1969 |
| M18                  | I-sigma                             | spontaneous               | hookeri de Vries                   | H. Kutzelnigg in 1971 |
| M19                  | I-tau                               | spontaneous <sup>4)</sup> | hookeri de Vries                   | H. Kutzelnigg in 1971 |
| M20                  | I-ypsilon                           | spontaneous               | hookeri de Vries                   | W. Stubbe in 1957     |
| M21                  | I-phi                               | spontaneous <sup>4)</sup> | hookeri de Vries                   | H. Kutzelnigg in 1971 |
| M22                  | I-chi                               | spontaneous <sup>4)</sup> | hookeri de Vries                   | H. Kutzelnigg in 1971 |
| M23                  | I-psi                               | spontaneous <sup>4)</sup> | hookeri de Vries                   | H. Kutzelnigg in 1971 |
| M24                  | I-omega                             | spontaneous <sup>4)</sup> | hookeri de Vries                   | H. Kutzelnigg in 1971 |
| M25                  | I-do                                | spontaneous <sup>4)</sup> | hookeri de Vries                   | H. Kutzelnigg in 1971 |
| M26                  | I-re                                | spontaneous <sup>4)</sup> | hookeri de Vries                   | H. Kutzelnigg in 1971 |
| M27                  | I-mi                                | spontaneous <sup>4)</sup> | hookeri de Vries                   | H. Kutzelnigg in 1971 |
| M28                  | II-alpha                            | spontaneous               | suaveolens Fuenfkirchen            | W. Stubbe in 1950     |
| M29                  | II-beta = III-epsilon <sup>5)</sup> | spontaneous               | lamarckiana de Vries               | O. Renner in 1934     |

**Supplemental Table 1.** (continued)

| Mutant <sup>1)</sup> |                                  | Origin                                                            | Wild type background <sup>3)</sup>    | Experimenter / Year   |
|----------------------|----------------------------------|-------------------------------------------------------------------|---------------------------------------|-----------------------|
| M30                  | II-gamma                         | spontaneous                                                       | suaveolens Grado                      | W. Stubbe in 1950     |
| M31                  | II-delta                         | spontaneous                                                       | suaveolens Fuenfkirchen               | W. Stubbe in 1959     |
| M32                  | II-epsilon                       | spontaneous                                                       | suaveolens Fuenfkirchen               | W. Stubbe in 1960     |
| M33                  | II-zeta                          | spontaneous <sup>4)</sup>                                         | suaveolens Grado                      | H. Kutzelnigg in 1967 |
| M34                  | II-eta                           | spontaneous                                                       | suaveolens Fuenfkirchen               | W. Stubbe in 1956     |
| M35                  | II-theta                         | spontaneous                                                       | suaveolens Fuenfkirchen               | W. Stubbe in 1968     |
| M36                  | II-iota = IV-delta <sup>6)</sup> | spontaneous "second site mutant of II-zeta (M33)" <sup>4,6)</sup> | suaveolens Grado                      | H. Kutzelnigg in 1969 |
| M37                  | II-kappa                         | spontaneous                                                       | suaveolens Grado                      | W. Stubbe in 1957     |
| M38                  | II-lambda                        | spontaneous                                                       | suaveolens Fuenfkirchen               | Anonymous in 1973     |
| M39                  | II-my                            | spontaneous                                                       | suaveolens Grado                      | Anonymous in 1971     |
| M40                  | II-ny                            | spontaneous second site mutant of II-alpha (M28) <sup>7)</sup>    | suaveolens Fuenfkirchen               | Anonymous in 1976     |
| M41                  | III-alpha                        | spontaneous                                                       | deserens de Vries                     | W. Stubbe in 1954     |
| M42                  | III-beta                         | spontaneous                                                       | lamarckiana Sweden                    | W. Stubbe in 1960     |
| M43                  | III-gamma                        | spontaneous <sup>8)</sup>                                         | grandiflora Stockton 1                | H. Kutzelnigg in 1966 |
| M44                  | III-delta                        | spontaneous second site mutant of III-beta (M42) <sup>9)</sup>    | lamarckina Sweden                     | H. Kutzelnigg in 1970 |
| M45                  | IV-alpha                         | spontaneous <sup>10)</sup>                                        | ammophila Standard                    | H. Kutzelnigg in 1966 |
| M46                  | IV-beta                          | spontaneous                                                       | ammophila Standard                    | H. Kutzelnigg in 1967 |
| M47                  | IV-delta                         | spontaneous                                                       | atrovirens Standard                   | M. Drillisch in 1971  |
| M48                  | IV-epsilon                       | spontaneous                                                       | ammophila Standard                    | W. Stubbe in 1976     |
| M49                  | V-alpha                          | spontaneous                                                       | argillicola Douthat 4b <sup>11)</sup> | W. Stubbe in 1963     |
| M50                  | V-delta                          | spontaneous                                                       | argillicola Standard                  | W. Stubbe in 1964     |
| M51                  | I-fa                             | spontaneous                                                       | johansen Standard                     | S. Greiner in 2011    |

<sup>1)</sup> Mutants are designated as described in Table 1.

<sup>2)</sup> For details on the corresponding wild type *Oenothera* strains, please refer to Supplemental Table 2.

- 3) This mutant was isolated during a “mutagenesis” approach using streptomycin. Since the mutagenic action of streptomycin could not be demonstrated in the corresponding study, the mutant is treated as a spontaneous one. For details see Kutzelnigg (1968).
- 4) This mutant was isolated during a mutagenesis approach using the chloroplast mutagen methyl-nitro-nitroso-guanidine (MNNG). However, the mutagenic action of this agent could not be demonstrated in the corresponding study (Kutzelnigg, 1968), but shown later (see Greiner, 2012 for summary). Nevertheless, the detected mutation in the mutant does not fit to the molecular action of MNNG, mostly causing transitions (Sockett et al., 1991; Table 1). The mutant is therefore treated as a spontaneous one.
- 5) This mutant was obtained from W. Stubbe with the description “II-beta; isolated by O. Renner in 1934, identical with the earlier described II-zeta”. However, since the mutant shares the genetic background of the plastome III of *lamarckiana* de Vries (or its *vetaurea* form) we re-designated this mutant to III-epsilon.
- 6) The mutant M36 (II-iota) was identified by phenotype as second site mutant of M33 (II-zeta). It should be in the genetic background of basic plastome II. However, in this analysis M36 (II-iota) was found to be identical with M47 (IV-delta) in a plastome IV background. If the mutant pair II-iota/IV-delta was mixed up is unsure. There is the possibility that M36 (II-iota) might be a *de novo* mutation of the nursery plastome IV used for maintenance of M33 (II-zeta); see Material and Methods for details.
- 7) M40 (II-ny) is a second site mutant, which was isolated based on a phenotypic change of the already pre-existing chloroplast mutant M28 (II-alpha).
- 8) This mutant was isolated during a “mutagenesis” approach using streptomycin (tentative). Since the mutagenic action of streptomycin could not be demonstrated in the corresponding study, the mutant is treated as a spontaneous one. For details see Kutzelnigg (1968).
- 9) M44 (III-delta) is a second site mutant, which was isolated based on a phenotypic change of the already pre-existing chloroplast mutant M42 (III-beta).
- 10) This mutant was isolated during a “mutagenesis” approach using trypaflavin. Since the mutagenic action of trypaflavin could not be demonstrated in the corresponding study, the mutant is treated as a spontaneous one. For details see Kutzelnigg (1968).
- 11) The wild type strain *argillicola* Douthat 4b is no longer present in our genetic stocks.

## References

- Greiner, S.** (2012). Plastome mutants of higher plants. In *Genomics of Chloroplasts and Mitochondria*, R. Bock and V. Knoop, eds (Dordrecht, Heidelberg, New York, London: Springer Netherlands), pp. 237-266.
- Kutzelnigg, H.** (1968). Versuche zur Auflösung von Plastommutationen bei *Oenothera*. PhD Thesis (Düsseldorf: Heinrich-Heine-Universität), pp. 69.
- Sockett, H., Romac, S., and Hutchinson, F.** (1991). Mutagenic specificity of N'-methyl-N'-nitro-N-nitrosoguanidine in the gpt gene on a chromosome of Chinese hamster ovary cells and of *Escherichia coli* cells. *Mol. Gen. Genet.* **227**: 252-259.

**Supplemental Table 2A.** Wild type *Oenothera* strains used this work<sup>1)</sup>

| Species                             | Strain                                | Locality                                       | Collection date | Collector           | Reference |
|-------------------------------------|---------------------------------------|------------------------------------------------|-----------------|---------------------|-----------|
| <i>O. elata</i> ssp. <i>elata</i>   | elata Toluca                          | Mexico, México, Toluca de Lerdo                | 1937            | P. A. Munz          | [1]       |
| <i>O. elata</i> ssp. <i>hookeri</i> | johansen Standard                     | USA, CA, Sutter Co., Yuba City                 | 1927            | C. B. Wolf          | [2]       |
| <i>O. elata</i> ssp. <i>hookeri</i> | hookeri de Vries                      | USA, CA, Alameda Co., Berkeley                 | 1904            | H. de Vries         | [3]       |
| <i>O. grandiflora</i>               | grandiflora Stockton 1                | USA, AL, Baldwin Co., Stockton                 | 1962            | P. Biebel           | [4,5]     |
| <i>O. biennis</i>                   | suaveolens Grado                      | Italy, Friuli-Venezia Giulia, Grado            | before 1950     | H. Zeidler          | [6,7]     |
| <i>O. biennis</i>                   | <i>xa/xa</i> -suaveolens Fuenfkirchen | Hungary, Baranya, Pécs                         | before 1949     | E. Preuss           | [6,7]     |
| <i>O. glazioviana</i>               | <i>r/r</i> -lamarckiana Sweden        | Sweden, Skåne Län, Almaröd                     | 1906            | N. Heribert-Nilsson | [8]       |
| <i>O. parviflora</i>                | atrovirens Standard <sup>2)</sup>     | USA, NY, Erie Co., Sandy Hill                  | 1902/1903       | D. T. MacDouglas    | [3,9]     |
| <i>O. oakesiana</i>                 | ammophila Standard                    | Germany, Schleswig-Holstein, Helgoland         | 1922            | E. Hoepfener        | [10]      |
| <i>O. argillicola</i>               | argillicola Douthat 1                 | USA, VA, Allegheny Co., Wilson Creek           | 1947            | R. B. Platt         | [11]      |
| <i>O. argillicola</i>               | argillicola Standard                  | USA, WV, Greenbrier Co., White Sulphur Springs | 1928            | H. H. Bartlett      | [12]      |

<sup>1)</sup> For details on *Oenothera* taxonomy and strain designation see [13-15].

<sup>2)</sup> According to Renner [9] this line was originally "received from Amsterdam" by N. v. Gescher in 1907. The material is quite likely identical to that collected by D. T. MacDouglas in 1902/1903 as described in [3]. Also see [16].

**Supplemental Table 2B.** Nuclear genome mutants derived from *O. glazioviana* strain lamarckiana de Vries used in this work<sup>1)</sup>.

| Species <sup>2)</sup> | Mutant                                     | Description                                                                                                           | Isolated in | Worker      | Reference  |
|-----------------------|--------------------------------------------|-----------------------------------------------------------------------------------------------------------------------|-------------|-------------|------------|
| <i>O. glazioviana</i> | deserens de Vries <sup>3)</sup>            | chromosome translocation mutant                                                                                       | 1913        | H. de Vries | [14,17]    |
| <i>O. glazioviana</i> | blandina de Vries <sup>4)</sup>            | chromosome translocation mutant                                                                                       | 1908        | H. de Vries | [14,18,19] |
| <i>O. glazioviana</i> | vet/vet-lamarckiana de Vries <sup>4)</sup> | spontaneous single locus mutation <i>vetaurea</i> ( <i>vet</i> or <i>v</i> ) on chromosome 1·2 affecting flower color | 1921        | G. H. Shull | [14,20,21] |

<sup>1)</sup> For details on *Oenothera* taxonomy and strain designation see [13-15].

<sup>2)</sup> The original lamarckiana de Vries was first collected in 1886 at Hilversum (The Netherlands, Noord-Holland) by Hugo de Vries [3].

<sup>2)</sup> *Syn: O. deserens* de Vries; *O. lamarckiana* de Vries mut. *deserens*.

<sup>3)</sup> *Syn: O. blandina* de Vries; *O. lamarckiana* de Vries mut. *blandina*; *O. lamarckiana* de Vries mut. *veluntina*.

<sup>4)</sup> *Syn: O. lamarckiana* de Vries mut. *vetaurea*.

**Supplemental Table 2C.** Chloroplast substitutions lines obtained from introgression breeding used in this work.

| Line                                       | Nuclear Genome Donor <sup>1)</sup>                           | Chloroplast Genome Donor <sup>1)</sup>                      | Basic plastome <sup>3)</sup> | Produced by | Use in this work as                                   | Reference |
|--------------------------------------------|--------------------------------------------------------------|-------------------------------------------------------------|------------------------------|-------------|-------------------------------------------------------|-----------|
| johansen Standard I <sup>hookdV</sup>      | <i>O. elata</i> ssp. <i>hookeri</i> strain johansen Standard | <i>O. elata</i> ssp. <i>hookeri</i> strain hookeri de Vries | I                            | S. Greiner  | wild type control for Northern analyses               | this work |
| johansen Standard II <sup>suvaG</sup>      | <i>O. elata</i> ssp. <i>hookeri</i> strain johansen Standard | <i>O. biennis</i> strain suaveolens Grado                   | II                           | W. Stubbe   | wild type control for Northern analyses <sup>2)</sup> | [22,23]   |
| johansen Standard IV <sup>atroSt</sup>     | <i>O. elata</i> ssp. <i>hookeri</i> strain johansen Standard | <i>O. parviflora</i> strain atrovirens Standard             | IV                           | W. Stubbe   | nursery plastome donor <sup>4)</sup>                  | [22,23]   |
| argillicola Douthat 1 IV <sup>atroSt</sup> | <i>O. argillicola</i> strain argillicola Douthat 1           | <i>O. parviflora</i> strain atrovirens Standard             | IV                           | W. Stubbe   | nursery plastome donor <sup>4)</sup>                  | this work |

<sup>1)</sup> For details on the stains see Supplemental Table 1A.

<sup>2)</sup> This line with the chloroplast genome of *O. biennis* strain suaveolens Grado was used as a wild type control for the chloroplast mutants II-delta, II-theta and II-kappa (see Material and Methods). The latter mutant has occurred in the background of *O. biennis* strain suaveolens Grado. II-delta and II-theta are derived from *O. biennis* strain suaveolens Fuenfkirchen, (Supplemental Table 1). The chloroplast genomes of both wild type strains are identical, however (see Supplemental Table 3 for details).

<sup>3)</sup> See Supplemental Table 3 for details on the wildtype plastomes.

<sup>4)</sup> For details see [24].

## References

1. **Steiner, E.E.** (1951). Phylogenetic relationships of certain races of *Euoenothea* from Mexico and Guatemala. *Evolution* **5**: 265-272.
2. **Cleland, R.E.** (1935). Cyto-taxonomic studies on certain *Oenotheras* from California. *Proc. Am. Philos. Soc.* **75**: 339-429.
3. **de Vries, H.** (1913). Gruppenweise Artbildung - Unter spezieller Berücksichtigung der Gattung *Oenothera* (Berlin: Gebrüder Borntraeger).
4. **Steiner, E.E., and Stubbe, W.** (1984). A contribution to the population biology of *Oenothera grandiflora* L'Her. *Am. J. Bot.* **71**: 1293-1301.
5. **Pry, J.T.** (2010). William Bartram's *Oenothera grandiflora*: "The Most Pompous and Brilliant Herbaceous Plant yet Known to Exist". In *Fields of Vision - Essays on the Travels of William Bartram, K.E. Holland Braund and C.M. Porter*, eds (Tuscaloosa: University of Alabama Press), pp. 183-203.
6. **Renner, O.** (1950). Europäische Wildarten von *Oenothera*: II. Ber. Dtsch. Bot. Ges. **63**: 129-138.
7. **Stubbe, W.** (1953). Genetische und zytologische Untersuchungen an verschiedenen Sippen von *Oenothera suaveolens*. *Z. Indukt. Abstamm. Vererbungsl.* **85**: 180-209.
8. **Heribert-Nilsson, N.** (1912). Die Variabilität der *Oenothera Lamarckiana* und das Problem der Mutation. *Z. Indukt. Abstamm. Vererbungsl.* **8**: 89-231.
9. **Renner, O.** (1938). Über *Oenothera atrovirens* Sh. et Bartl. und über somatische Konversion im Erbgang des *cruciata*-Merkmals der Oenotheren. *Z. Indukt. Abstamm. Vererbungsl.* **74**: 91-124.
10. **Hoepfener, E, and Renner, O.** (1929). Genetische und zytologische Oenotherenstudien: I. Zur Kenntnis der *Oenothera ammophila* Focke. *Z. Indukt. Abstamm. Vererbungsl.* **49**: 1-25.
11. **Stinson, H.T.** (1953). Cytogenetics and phylogeny of *Oenothera argillicola* Mackenz. *Genetics* **38**: 389-406.
12. **Mickan, M.** (1936). Zur Kenntnis der *Oenothera argillicola* Mackenzie. Genetische und zytologische Untersuchungen. *Flora* **130**: 1-20.
13. **Dietrich, W., Wagner, W.L., and Raven, P.H.** (1997). Systematics of *Oenothera* section *Oenothera* subsection *Oenothera* (Onagraceae). *Syst. Bot. Monogr.* **50**: 1-234.
14. **Cleland, R.E.** (1972). *Oenothera - Cytogenetics and Evolution.* (London, New York: Academic Press Inc.).
15. **Harte, C.** (1994). *Oenothera - Contributions of a Plant to Biology.* (Berlin, Heidelberg, New York: Springer).
16. **Bartlett, H.H.** (1914). An account of the cruciate-flowered *Oenotheras* of the subgenus *Onagra*. *Am. J. Bot.* **1**: 226-243.
17. **de Vries, H.** (1919). *Oenothera rubrinervis*, a half mutant. *Bot. Gaz.* **67**: 1-26.
18. **de Vries, H.** (1917). *Oenothera Lamarckiana* mut. *veluntina*. *Bot. Gaz.* **63**: 1-24.
19. **de Vries, H.** (1923). Über die Entstehung der *Oenothera Lamarckiana* mut. *Veluntina*. *Biol. Centralbl.* **43**: 213-224.
20. **Shull, G.H.** (1921). Three new mutations in *Oenothera Lamarckiana*. *J. Hered.* **12**: 354-363.
21. **Shull, G.H.** (1926). "Old-gold" flower color, the second case of independent inheritance in *Oenothera*. *Genetics* **11**: 201-234.
22. **Stubbe, W.** (1960). Untersuchungen zur genetischen Analyse des Plastoms von *Oenothera*. *Z. Bot.* **48**: 191-218.
23. **Stubbe, W.** (1989). *Oenothera - An ideal system for studying the interaction of genome and plastome.* *Plant Mol. Biol. Rep.* **7**: 245-257.
24. **Greiner, S.** (2012). Plastome mutants of higher plants. In *Genomics of Chloroplasts and Mitochondria*, R. Bock and V. Knoop, eds (Dordrecht, Heidelberg, New York, London: Springer Netherlands), pp. 237-266.

**Supplemental Table 3.** Summary on the wild type *Oenothera* chloroplast genomes determined *de novo* or re-sequenced in this work<sup>1)</sup>

| Species                             | Strain <sup>1)</sup>                  | Basic plastome <sup>2)</sup> | Size [bp] | GenBank/EMBL accession number | Sequencing Method                             | Reference        |
|-------------------------------------|---------------------------------------|------------------------------|-----------|-------------------------------|-----------------------------------------------|------------------|
| <i>O. elata</i> ssp. <i>elata</i>   | elata Toluca                          | I                            | 165,403   | KT881169.2                    | Illumina <sup>3)</sup>                        | this work        |
| <i>O. elata</i> ssp. <i>hookeri</i> | johansen Standard                     | I                            | 165,899   | AJ271079.4                    | Illumina, PacBio, 454 <sup>4)</sup><br>Sanger | [1,2]; this work |
| <i>O. elata</i> ssp. <i>hookeri</i> | hookeri de Vries                      | I                            | 165,359   | KT881170.1                    | Illumina <sup>5)</sup> , 454, Sanger          | this work        |
| <i>O. biennis</i> <sup>6)</sup>     | suaveolens Grado                      | II                           | 164,796   | EU262889.2                    | Illumina, Sanger                              | [1,2]; this work |
| <i>O. biennis</i> <sup>6)</sup>     | <i>xa/xa</i> -suaveolens Fuenfkirchen | II                           | 164,796   | KT881175.1                    | Illumina, 454 <sup>2)</sup>                   | this work        |
| <i>O. glazioviana</i>               | <i>r/r</i> -lamarckiana Sweden        | III                          | 165,359   | EU262890.2                    | Illumina, Sanger                              | [1,2]; this work |
| <i>O. glazioviana</i>               | <i>vet/vet</i> -lamarckiana de Vries  | III                          | 165,408   | KT881174.1                    | Illumina <sup>3)</sup>                        | this work        |
| <i>O. glazioviana</i>               | deserens de Vries                     | III                          | 165,381   | KT881172.1                    | Illumina <sup>3)</sup>                        | this work        |
| <i>O. glazioviana</i>               | blandina de Vries                     | III                          | 165,387   | KT881171.1                    | Illumina <sup>3)</sup>                        | this work        |
| <i>O. grandiflora</i>               | grandiflora Stockton 1                | III                          | 166,545   | KT881173.1                    | Illumina <sup>3)</sup>                        | this work        |
| <i>O. parviflora</i>                | atrovirens Standard                   | IV                           | 163,367   | EU262891.2                    | Illumina, Sanger                              | [1,2]; this work |
| <i>O. oakesiana</i>                 | ammophila Standard                    | IV                           | 163,575   | KT881176.1                    | Illumina, 454 <sup>2)</sup>                   | this work        |
| <i>O. argillicola</i>               | argillicola Douthat 1                 | V                            | 165,061   | EU262887.2                    | Illumina, Sanger                              | [1,2], this work |
| <i>O. argillicola</i>               | argillicola Standard                  | V                            | 165,063   | KT881177.1                    | Illumina, Sanger                              | this work        |

<sup>1)</sup> For details on the corresponding *Oenothera* strains see Supplemental Table 2.

<sup>2)</sup> In *Oenothera* five genetically distinguishable plastome types (I-V) can be recognized based on their compatibility relation with three nuclear genomes (A, B, C) in either homozygous (AA, BB, CC) or stable heterozygous (AB, AC, BC) state. Basic plastome and nuclear genome type are an important factor of species definition in *Oenothera*. For details see e.g. [1-5].

<sup>3)</sup> Gap closure performed by Sanger sequencing. For details see Methods.

<sup>4)</sup> 454 reads were obtained from M6 (I-zeta). See Supplemental Table 1 and 4 for details.

<sup>5)</sup> Illumina reads were obtained from M9 (I-iota) and M19 (I-tau). See Supplemental Table 1 and 4 for details.

<sup>6)</sup> The chloroplast genomes of the two *O. biennis* lines, belonging to the morphotype of the European micro-species *O. suaveolens* [cf. 6,7], were found to be identical.

## References

1. **Greiner, S., Wang, X., Rauwolf, U., Silber, M.V., Mayer, K., Meurer, J., Haberer, G., and Herrmann, R.G.** (2008a). The complete nucleotide sequences of the five genetically distinct plastid genomes of *Oenothera*, subsection *Oenothera*: I. Sequence evaluation and plastome evolution. *Nucleic Acids Res.* **36**: 2366-2378.
2. **Greiner, S., Wang, X., Herrmann, R.G., Rauwolf, U., Mayer, K., Haberer, G., and Meurer, J.** (2008b). The complete nucleotide sequences of the 5 genetically distinct plastid genomes of *Oenothera*, subsection *Oenothera*: II. A microevolutionary view using bioinformatics and formal genetic data. *Mol. Biol. Evol.* **25**: 2019-2030.
3. **Stubbe, W.** (1989). *Oenothera* - An ideal system for studying the interaction of genome and plastome. *Plant Mol. Biol. Rep.* **7**: 245-257.
4. **Greiner, S., Rauwolf, U., Meurer, J., and Herrmann, R.G.** (2011). The role of plastids in plant speciation. *Mol. Ecol.* **20**: 671-691.
5. **Dietrich, W., Wagner, W.L., and Raven, P.H.** (1997). Systematics of *Oenothera* section *Oenothera* subsection *Oenothera* (Onagraceae). *Syst. Bot. Monogr.* **50**: 1-234.
6. **Rostański, K.** (1985). Zur Gliederung der Subsektion *Oenothera* (Sektion *Oenothera*, *Oenothera* L., Onagraceae). *Feddes Repert.* **96**: 3-14.
7. **Renner, O.** (1942). Europäische Wildarten von *Oenothera*. *Ber. Dtsch. Bot. Ges.* **60**: 448-466.

Supplemental Data. Massouh et al. (2016). Plant Cell 10.1105/tpc.15.00879

Supplemental Table 4. Major phenotypic classes of the *Oenothera* plastome mutants

| Mutant <sup>1)</sup> | Mutation in gene or locus | Leaf phenotype <sup>2)</sup>                      |        |       | Major phenotypic class of mature leaves |       |
|----------------------|---------------------------|---------------------------------------------------|--------|-------|-----------------------------------------|-------|
|                      |                           | Young                                             | Medium | Old   |                                         |       |
| M1                   | I-alpha                   | <i>psbD</i>                                       | 4      | 3-4   | 4                                       | pale  |
| M2                   | I-beta                    | <i>petD</i> and SSC-IRA junction                  | 4      | 3     | 1                                       | white |
| M3                   | I-gamma                   | <i>psbA</i>                                       | 3      | 2-3   | 1                                       | white |
| M4                   | I-delta                   | <i>psbD</i>                                       | 4      | 3-4   | 4                                       | pale  |
| M5                   | I-epsilon                 | <i>psbA</i>                                       | 3      | 2-3   | 1                                       | white |
| M6                   | I-zeta                    | <i>psaA</i>                                       | 1-2    | 1     | 1                                       | white |
| M7                   | I-eta                     | <i>psaA</i>                                       | 2      | 1-2   | 1                                       | white |
| M8                   | I-theta                   | <i>psaB</i>                                       | 2      | 1-2   | 1                                       | white |
| M9                   | I-iota                    | <i>atpB</i>                                       | (1)    | (1-4) | (4)                                     | pale  |
| M10                  | I-kappa                   | <i>psaA</i>                                       | 1-2    | 1-2   | 1-2                                     | white |
| M11                  | I-lambda                  | <i>psbA</i>                                       | 3-4    | 1-2   | 1                                       | white |
| M12                  | I-my                      | <i>ccsA</i>                                       | 4      | 3-4   | 1                                       | white |
| M13                  | I-ny                      | <i>psaB</i>                                       | 2      | 1-2   | 1                                       | white |
| M14                  | I-xi                      | <i>psbD</i>                                       | 4      | 3-4   | 1                                       | white |
| M15                  | I-omicron                 | <i>psaA</i>                                       | 1-2    | 1-2   | 1-2                                     | white |
| M16                  | I-pi                      | <i>psbA</i>                                       | 3-4    | 2-3   | 1                                       | white |
| M17                  | I-rho                     | <i>psbA</i> and upstream <i>accD</i>              | 3-4    | 2     | 1                                       | white |
| M18                  | I-sigma                   | <i>rbcL</i>                                       | 4      | 4     | 4                                       | pale  |
| M19                  | I-tau                     | <i>rps7</i>                                       | (1-4)  | (1-4) | (1-4)                                   | pale  |
| M20                  | I-ypsilon                 | <i>atpB</i> and <i>ycf1</i> ( <i>tic214</i> )     | (1)    | (1)   | (1)                                     | white |
| M21                  | I-phi                     | <i>ccsA</i>                                       | 3-4    | 2     | 2                                       | white |
| M22                  | I-chi                     | <i>psaA</i>                                       | 1-2    | 1     | 1                                       | white |
| M23                  | I-psi                     | <i>ycf3</i> (intron)                              | 1-2    | 2     | 2                                       | white |
| M24                  | I-omega                   | <i>psaA</i>                                       | 1-2    | 1     | 1                                       | white |
| M25                  | I-do                      | <i>ccsA</i>                                       | 3      | 2     | 2                                       | white |
| M26                  | I-re                      | <i>petA</i>                                       | 2-3    | 1-2   | 1-2                                     | white |
| M27                  | I-mi                      | <i>petA</i>                                       | 2-3    | 1-2   | 1-2                                     | white |
| M28                  | II-alpha                  | <i>ycf4</i>                                       | 3      | 2-3   | 1                                       | white |
| M29                  | II-beta = III-epsilon     | <i>ycf3</i>                                       | 2      | 1     | 1                                       | white |
| M30                  | II-gamma                  | <i>psbE</i>                                       | 4      | 2-3   | 1-2                                     | white |
| M31                  | II-delta                  | <i>ndhE-psaC</i> spacer                           | 4      | 4     | 4                                       | pale  |
| M32                  | II-epsilon                | <i>psaA</i>                                       | 2      | 1     | 1                                       | white |
| M33                  | II-zeta                   | <i>psbB</i>                                       | 4      | 2-3   | 1                                       | white |
| M34                  | II-eta                    | <i>petB</i>                                       | 4      | 3     | 1                                       | white |
| M35                  | II-theta                  | <i>petB</i> (intron)                              | 4      | 3     | 1                                       | white |
| M36                  | II-iota = IV-delta        | <i>psaA</i>                                       | 2      | 2     | 2                                       | white |
| M37                  | II-kappa                  | <i>ycf3</i> (intron) and <i>ndhF-rpl32</i> spacer | 3-4    | 3-4   | 4                                       | pale  |
| M38                  | II-lambda                 | <i>petA</i>                                       | 4      | 3-4   | 2-3                                     | pale  |
| M39                  | II-my                     | <i>petA</i> and <i>ndhG-ndhI</i> spacer           | 3-4    | 3-4   | 1-2                                     | white |
| M40                  | II-ny                     | <i>ycf4</i> and <i>psbB</i>                       | 2      | 1-2   | 1                                       | white |
| M41                  | III-alpha                 | <i>psbD</i>                                       | 4      | 3-4   | 1                                       | white |
| M42                  | III-beta                  | <i>psaB</i>                                       | 1-3    | 1-3   | 1-3                                     | pale  |
| M43                  | III-gamma                 | <i>psaA</i> and <i>trnQ-accD</i> spacer           | 1-2    | 1-2   | 1                                       | white |
| M44                  | III-delta                 | <i>psaB</i> and <i>atpB</i>                       | 1      | 1     | 1                                       | white |
| M45                  | IV-alpha                  | <i>psaA</i>                                       | 3      | 1-2   | 1                                       | white |
| M46                  | IV-beta                   | <i>rbcL</i>                                       | 4      | 4     | 3-4                                     | pale  |
| M47                  | IV-delta                  | <i>psaA</i>                                       | 2      | 2     | 2                                       | white |
| M48                  | IV-epsilon                | <i>psbA</i>                                       | 3      | 2-3   | 1-2                                     | white |
| M49                  | V-alpha                   | <i>rbcL</i> (tentative)                           | 4      | 4     | 4                                       | pale  |
| M50                  | V-delta                   | <i>ycf3</i> and <i>accD</i>                       | 4      | 3     | 1                                       | white |
| M51                  | I-fa                      | <i>ccsA</i>                                       | 3      | 2-3   | 1-2                                     | white |

<sup>1)</sup> Mutants are designated as described in Table 1.

<sup>2)</sup> 1 = nearly white, 2 = yellowish cream-colored, 3 = light green, 4 = nearly green

Supplemental Data. Massouh et al. (2016). Plant Cell 10.1105/tpc.15.00879

Supplemental Table 5. Sequencing and assembly methods of the full chloroplast genomes determined in this study

| Species or mutant <sup>1)</sup>     | Wild type strain or mutant <sup>1)</sup> | Sequencing method <sup>2)</sup>      | GenBank/EMBL accession number <sup>3)</sup> | Assembly / Mutant identification    |
|-------------------------------------|------------------------------------------|--------------------------------------|---------------------------------------------|-------------------------------------|
| <i>O. elata</i> ssp. <i>elata</i>   | elata Toluca                             | Illumina                             | KT881169.1                                  | <i>de novo</i>                      |
| <i>O. elata</i> ssp. <i>hookeri</i> | johansen Standard                        | Illumina, 454 <sup>4)</sup> , PacBio | AJ271079.4                                  | Sanger reference-guided assembly    |
| <i>O. elata</i> ssp. <i>hookeri</i> | hookeri de Vries                         | Illumina <sup>5)</sup> , 454         | KT881170.1                                  | Sanger reference-guided assembly    |
| <i>O. biennis</i>                   | suaveolens Grado                         | Illumina                             | EU262889.2                                  | Sanger reference-guided assembly    |
| <i>O. biennis</i>                   | <i>xa/xa</i> -suaveolens Fuenfkirchen    | Illumina, 454                        | KT881175.1                                  | <i>de novo</i>                      |
| <i>O. glazioviana</i>               | <i>r/r</i> -lamarckiana Sweden           | Illumina                             | EU262890.2                                  | Sanger reference-guided assembly    |
| <i>O. glazioviana</i>               | <i>vet/vet</i> -lamarckiana de Vries     | Illumina                             | KT881174.1                                  | <i>de novo</i>                      |
| <i>O. glazioviana</i>               | deserens de Vries                        | Illumina                             | KT881172.1                                  | <i>de novo</i>                      |
| <i>O. glazioviana</i>               | blandina de Vries                        | Illumina                             | KT881171.1                                  | <i>de novo</i>                      |
| <i>O. grandiflora</i>               | grandiflora Stockton 1                   | Illumina                             | KT881173.1                                  | <i>de novo</i>                      |
| <i>O. parviflora</i>                | atrovirens Standard                      | Illumina                             | EU262891.2                                  | Sanger reference-guided assembly    |
| <i>O. oakesiana</i>                 | ammophila Standard                       | Illumina, 454                        | KT881176.1                                  | <i>de novo</i>                      |
| <i>O. argillicola</i>               | argillicola Douthat 1                    | Illumina                             | EU262887.2                                  | Sanger reference-guided assembly    |
| <i>O. argillicola</i>               | argillicola Standard                     | Illumina                             | KT881177.1                                  | <i>de novo</i>                      |
| M1                                  | I-alpha                                  | Illumina, 454                        | -                                           | <i>de novo</i>                      |
| M2                                  | I-beta                                   | Illumina                             | -                                           | wild type reference-guided assembly |
| M3                                  | I-gamma                                  | Illumina, 454                        | -                                           | <i>de novo</i>                      |
| M4                                  | I-delta                                  | Illumina, 454                        | -                                           | <i>de novo</i>                      |
| M5                                  | I-epsilon                                | Illumina                             | -                                           | wild type reference-guided assembly |
| M6                                  | I-zeta                                   | Illumina, 454                        | -                                           | <i>de novo</i>                      |
| M7                                  | I-eta                                    | Illumina, 454                        | -                                           | <i>de novo</i>                      |
| M8                                  | I-theta                                  | Illumina, 454                        | -                                           | <i>de novo</i>                      |
| M9                                  | I-iota                                   | Illumina, 454                        | -                                           | <i>de novo</i>                      |
| M10                                 | I-kappa                                  | Illumina, 454                        | -                                           | <i>de novo</i>                      |
| M11                                 | I-lambda                                 | Illumina                             | -                                           | wild type reference-guided assembly |
| M12                                 | I-my                                     | Illumina                             | -                                           | wild type reference-guided assembly |
| M13                                 | I-ny                                     | Illumina                             | -                                           | wild type reference-guided assembly |
| M14                                 | I-xi                                     | Illumina                             | -                                           | wild type reference-guided assembly |
| M15                                 | I-omicron                                | Illumina                             | -                                           | wild type reference-guided assembly |
| M16                                 | I-pi                                     | Illumina                             | -                                           | wild type reference-guided assembly |
| M17                                 | I-rho                                    | Illumina                             | -                                           | wild type reference-guided assembly |
| M18                                 | I-sigma                                  | Illumina                             | -                                           | wild type reference-guided assembly |
| M19                                 | I-tau                                    | Illumina                             | -                                           | wild type reference-guided assembly |
| M20                                 | I-ypsilon                                | Illumina                             | -                                           | wild type reference-guided assembly |
| M21                                 | I-phi                                    | Illumina                             | -                                           | wild type reference-guided assembly |
| M22                                 | I-chi                                    | Illumina                             | -                                           | wild type reference-guided assembly |
| M23                                 | I-psi                                    | Illumina                             | -                                           | wild type reference-guided assembly |
| M24                                 | I-omega                                  | Illumina                             | -                                           | wild type reference-guided assembly |
| M25                                 | I-do                                     | Illumina                             | -                                           | wild type reference-guided assembly |
| M26                                 | I-re                                     | Illumina                             | -                                           | wild type reference-guided assembly |
| M27                                 | I-mi                                     | Illumina                             | -                                           | wild type reference-guided assembly |
| M28                                 | II-alpha                                 | Illumina                             | -                                           | wild type reference-guided assembly |
| M29                                 | II-beta = III-epsilon                    | Illumina, 454                        | -                                           | <i>de novo</i>                      |
| M30                                 | II-gamma                                 | Illumina                             | -                                           | wild type reference-guided assembly |
| M31                                 | II-delta                                 | Illumina                             | -                                           | wild type reference-guided assembly |
| M32                                 | II-epsilon                               | Illumina                             | -                                           | wild type reference-guided assembly |
| M33                                 | II-zeta                                  | Illumina                             | -                                           | wild type reference-guided assembly |
| M34                                 | II-eta                                   | Illumina                             | -                                           | wild type reference-guided assembly |
| M35                                 | II-theta                                 | Illumina                             | -                                           | wild type reference-guided assembly |
| M36                                 | II-iota = IV-delta                       | Illumina                             | -                                           | wild type reference-guided assembly |
| M37                                 | II-kappa                                 | Illumina                             | -                                           | wild type reference-guided assembly |
| M38                                 | II-lambda                                | Illumina                             | -                                           | wild type reference-guided assembly |
| M39                                 | II-my                                    | Illumina                             | -                                           | wild type reference-guided assembly |
| M40                                 | II-ny                                    | Illumina                             | -                                           | wild type reference-guided assembly |
| M41                                 | III-alpha                                | Illumina                             | -                                           | wild type reference-guided assembly |
| M42                                 | III-beta                                 | Illumina                             | -                                           | wild type reference-guided assembly |
| M43                                 | III-gamma                                | Illumina, 454                        | -                                           | <i>de novo</i>                      |
| M44                                 | III-delta                                | Illumina                             | -                                           | wild type reference-guided assembly |
| M45                                 | IV-alpha                                 | Illumina                             | -                                           | wild type reference-guided assembly |
| M46                                 | IV-beta                                  | Illumina                             | -                                           | wild type reference-guided assembly |
| M47                                 | IV-delta                                 | Illumina                             | -                                           | wild type reference-guided assembly |
| M48                                 | IV-epsilon                               | Illumina, 454                        | -                                           | <i>de novo</i>                      |
| M49                                 | V-alpha                                  | Illumina                             | -                                           | wild type reference-guided assembly |
| M50                                 | V-delta                                  | Illumina                             | -                                           | wild type reference-guided assembly |
| M51                                 | I-fa                                     | Illumina                             | -                                           | wild type reference-guided assembly |

<sup>1)</sup> For details on the wild type strains and chloroplast mutant lines, see Table 1 and Supplemental Table 2.

<sup>2)</sup> Gap closure performed by Sanger sequencing. For details see Material and Methods.

<sup>3)</sup> See Supplemental Table 3 for details on the wildtype reference plastomes.

<sup>4)</sup> 454 reads were obtained from M6 (I-zeta). See Table 1 and Supplemental Table 1 for details.

<sup>5)</sup> Illumina reads were obtained from M9 (I-iota) and M19 (I-tau). See Table 1 and Supplemental Table 1 for details.
